# Supplementary material for: Paradoxical Effects of All-Trans-Retinoic Acid on Lupus-Like Disease in the MRL/lpr Mouse Model
Source: PubMed Central journal article supplement (PMC4361690; doi:10.1371/journal.pone.0118176), 2015-03-16
Supplement: pone.0118176.s005.pdf [file pone.0118176.s005.pdf]

## S1 Primer Sequences

IL-6 forward: 5'-TAG TCC TTC CTA CCC CAA TTT CC-3'

IL-6 backward: 5'- TTG GTC CTT AGC CAC TCC TTC-3'

IL-21 forward: 5'-GGA CCC TTG TCT GTC TGG TAG-3'

IL-21 backward: 5'-TGT GGA GCT GAT AGA AGT TCA GG-3'

IFN $\alpha$  forward: 5'-TGA TGA GCT ACT ACT GGT CAG C-3'

IFN $\alpha$  backward: 5'-GAT CTC TTA GCA CAA GGA TGG C-3'

L32 forward: 5'-AAG CGA AAC TGG CGG AAA C-3'

L32 backward: 5'-TAA CCG ATG TTG GGC ATC AG-3'
